# Supplementary material for: Enhanced ammonia production via synergistic piezo-photocatalysis using TiO2@layered silicate magadiite nanosheets
Source: Royal Society of Chemistry journal article supplement (doi:10.1039/d4ta04298k), 2024-01-01
Supplement: d4ta04298k1.pdf [file d4ta04298k1.pdf]

## Supplementary Information

### Enhanced Ammonia Production via Synergistic Piezo-Photocatalysis Using

### TiO<sub>2</sub>@Layered Silicate Magadiite Nanosheets

Authors: Ke-Chun Ma<sup>1, a</sup>, Hsun-Yen Lin<sup>1,3, a</sup>, Yu-Ching Chen<sup>1, 3</sup>, Cheng-His Tsai<sup>1, b</sup>,  
Kai-Han Zheng<sup>1, b</sup>, and Jyh Ming Wu<sup>1,2\*</sup>

[\*] Prof. J. M. Wu [<sup>a, b</sup>] The authors contribute equally to this work

<sup>1</sup>Department of Materials Science and Engineering, National Tsing Hua University  
101, Section 2 Kuang Fu Road, Hsinchu 300, Taiwan.

<sup>2</sup>High Entropy Materials Center, National Tsing Hua University, 101, Section 2 Kuang  
Fu Road, Hsinchu 300, Taiwan.

<sup>3</sup>Ph.D. Program in Prospective Functional Materials Industry, National Tsing Hua  
University 101, Section 2 Kuang Fu Road, Hsinchu 300, Taiwan.

\*Corresponding author: wujm@mx.nthu.edu.tw

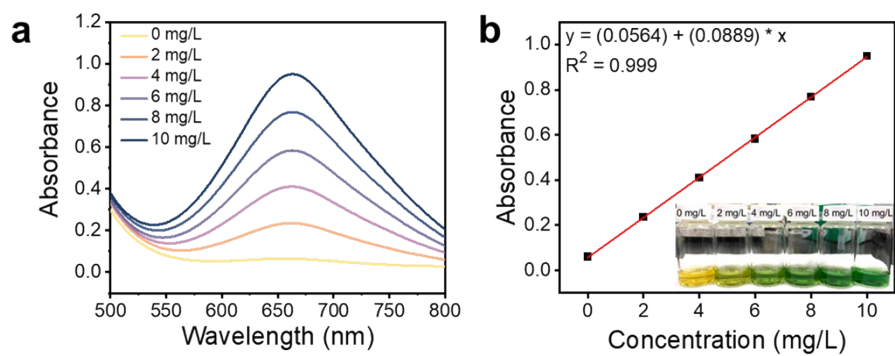

Figure S1. (a) UV-Vis absorption spectra of salicylate method after incubation for 2 h at room temperature; (b) Calibration curve used for the calculation of  $\text{NH}_3$  concentrations.

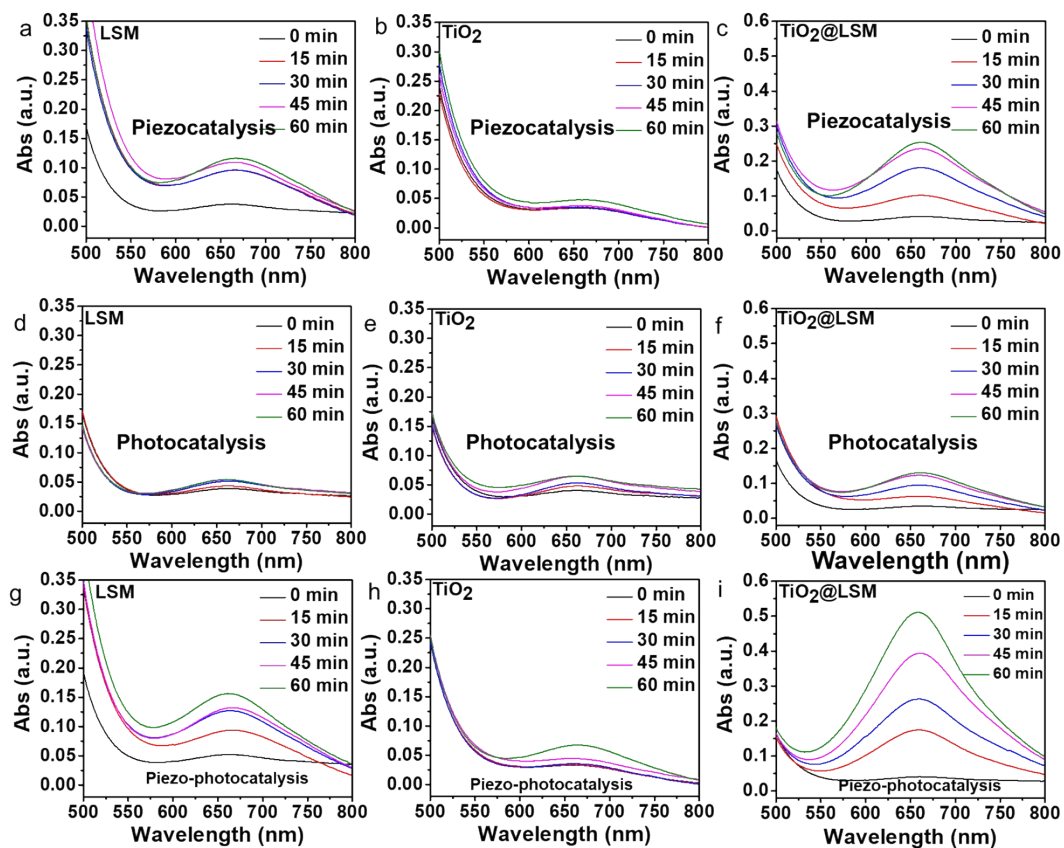

Figure S2. The UV-visible spectra results for the nitrogen reduction reaction (NRR) under various catalytic conditions; Piezocatalytic NRR: (a) LSM, (b)  $\text{TiO}_2$  NPs, and (c)  $\text{TiO}_2$ @LSM. Photocatalytic NRR: (d) LSM, (e)  $\text{TiO}_2$  NPs, and (f)  $\text{TiO}_2$ @LSM. Piezophotocatalytic NRR: (g) LSM, (h)  $\text{TiO}_2$  NPs, and (i) LSM nanosheets.

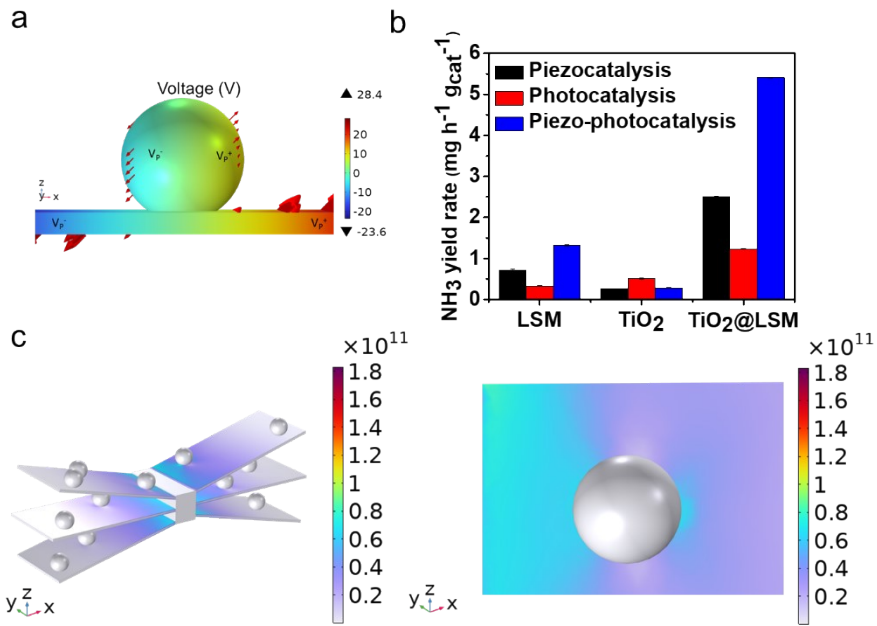

Figure S3. (a) The LSM induces a piezopotential spillover to the TiO<sub>2</sub> nanoparticles. (b) The NRR yield rates for LSM, TiO<sub>2</sub> NPs, and TiO<sub>2</sub>@LSM under different catalytic conditions. FEM simulation result of stress for (c) TiO<sub>2</sub>@LSM and (d) the enlarged figure showing the stress concentration at the interface of TiO<sub>2</sub> and LSM (unit: Nm<sup>-2</sup>).
